# Supplementary material
Source: ML conference proceedings conference paper supplement (https://proceedings.mlr.press/v84/bogunovic18a.html)
Supplement: Supplementary file 1 [file bogunovic18a-supp.pdf]

## Appendix

### Robust Maximization of Non-Submodular Objectives

(Ilija Bogunovic<sup>†</sup>, Junyao Zhao<sup>†</sup> and Volkan Cevher, AISTATS 2018)

#### A Organization of the Appendix

- Appendix B: Proofs from Section 2
- Appendix C: Proofs of the Main Result (Section 3)
- Appendix D: Proofs from Section 4
- Appendix E: Additional experiments

#### B Proofs from Section 2

##### B.1 Proof of Proposition 1

*Proof.* We prove the following relations:

- $\nu \geq \gamma, \check{\nu} \geq \check{\gamma}$ :

By setting  $S = \emptyset$  in both Eq. (4) and Eq. (5), we obtain  $\forall S \subseteq V$ :

$$\sum_{i \in S} f(\{i\}) \geq \gamma f(S), \quad (19)$$

and

$$f(S) \geq \check{\gamma} \sum_{i \in S} f(\{i\}). \quad (20)$$

The result follows since, by definition of  $\nu$  and  $\check{\nu}$ , they are the largest scalars such that Eq. (19) and Eq. (20) hold, respectively.

- $\gamma \geq 1 - \check{\alpha}, \check{\gamma} \geq 1 - \alpha$ :

Let  $S, \Omega \subseteq V$  be two arbitrary disjoint sets. We arbitrarily order elements of  $\Omega = \{e_1, \dots, e_{|\Omega|}\}$  and we let  $\Omega_{j-1}$  denote the first  $j-1$  elements of  $\Omega$ . We also let  $\Omega_0$  be an empty set.

By the definition of  $\check{\alpha}$  (see Eq. (7)) we have:

$$\begin{aligned} \sum_{j=1}^{|\Omega|} f(\{e_j\}|S) &= \sum_{j=1}^{|\Omega|} f(\{e_j\}|S \cup \{e_j\} \setminus \{e_j\}) \\ &\geq \sum_{j=1}^{|\Omega|} (1 - \check{\alpha}) f(\{e_j\}|S \cup \{e_j\} \setminus \{e_j\} \cup \Omega_{j-1}) \\ &= (1 - \check{\alpha}) f(\Omega|S), \end{aligned} \quad (21)$$

where the last equality is obtained via telescoping sums.

Similarly, by the definition of  $\alpha$  (see Eq. (6)) we have:

$$\begin{aligned} (1 - \alpha) \sum_{j=1}^{|\Omega|} f(\{e_j\}|S) &= \sum_{j=1}^{|\Omega|} (1 - \alpha) f(\{e_j\}|S \cup \{e_j\} \setminus \{e_j\}) \\ &\leq \sum_{j=1}^{|\Omega|} f(\{e_j\}|S \cup \{e_j\} \setminus \{e_j\} \cup \Omega_{j-1}) \\ &= f(\Omega|S). \end{aligned} \quad (22)$$

Because  $S$  and  $\Omega$  are arbitrary disjoint sets, and both  $\gamma$  and  $\check{\gamma}$  are the largest scalars such that for all disjoint sets  $S, \Omega \subseteq V$  the following holds  $\sum_{j=1}^{|\Omega|} f(\{e_j\}|S) \geq \gamma f(\Omega|S)$  and  $\check{\gamma} \sum_{j=1}^{|\Omega|} f(\{e_j\}|S) \leq f(\Omega|S)$ , it follows from Eq. (21) and Eq. (22), respectively, that  $\gamma \geq 1 - \check{\alpha}$  and  $\check{\gamma} \geq 1 - \alpha$ .

□

## B.2 Proof of Remark 1

*Proof.* Consider any set  $S \subseteq V$ , and  $A$  and  $B$  such that  $A \cup B = S$ ,  $A \cap B = \emptyset$ . We have

$$\frac{f(A) + f(B)}{f(S)} \geq \frac{\check{\nu} \sum_{i \in A} f(\{i\}) + \check{\nu} \sum_{i \in B} f(\{i\})}{f(S)} = \frac{\check{\nu} \sum_{i \in S} f(\{i\})}{f(S)} \geq \nu \check{\nu},$$

where the first and second inequality follow by the definition of  $\nu$  and  $\check{\nu}$  (Eq. (8) and Eq. (9)), respectively. By the definition (see Eq. (10)),  $\theta$  is the largest scalar such that  $f(A) + f(B) \geq \theta f(S)$  holds, hence, it follows  $\theta \geq \nu \check{\nu}$ . □

## C Proofs of the Main Result (Section 3)

### C.1 Proof of Lemma 2

We reproduce the proof from [2] for the sake of completeness.

*Proof.*

$$\begin{aligned} f(S \setminus E_S^*) &= f(S) - f(S) + f(S \setminus E_S^*) \\ &= f(S_0 \cup S_1) + f(S \setminus E_0) - f(S \setminus E_0) - f(S) + f(S \setminus E_S^*) \\ &= f(S_1) + f(S_0 \mid S_1) + f(S \setminus E_0) - f(S) - f(S \setminus E_0) + f(S \setminus E_S^*) \\ &= f(S_1) + f(S_0 \mid (S \setminus S_0)) + f(S \setminus E_0) - f(E_0 \cup (S \setminus E_0)) - f(S \setminus E_0) + f(S \setminus E_S^*) \\ &= f(S_1) + f(S_0 \mid (S \setminus S_0)) - f(E_0 \mid (S \setminus E_0)) - f(S \setminus E_0) + f(S \setminus E_S^*) \\ &= f(S_1) + f(S_0 \mid (S \setminus S_0)) - f(E_0 \mid (S \setminus E_0)) - f(E_1 \cup (S \setminus E_S^*)) + f(S \setminus E_S^*) \\ &= f(S_1) + f(S_0 \mid (S \setminus S_0)) - f(E_0 \mid (S \setminus E_0)) - f(E_1 \mid S \setminus E_S^*) \\ &= f(S_1) - f(E_1 \mid S \setminus E_S^*) + f(S_0 \mid (S \setminus S_0)) - f(E_0 \mid (S \setminus E_0)) \\ &\geq (1 - \mu)f(S_1), \end{aligned} \tag{23}$$

where we used  $S = S_0 \cup S_1$ ,  $E_S^* = E_0 \cup E_1$ . and (23) follows from monotonicity, i.e.,  $f(S_0 \mid (S \setminus S_0)) - f(E_0 \mid (S \setminus E_0)) \geq 0$  (due to  $E_0 \subseteq S_0$  and  $S \setminus S_0 \subseteq S \setminus E_0$ ), along with the definition of  $\mu$ . □

### C.2 Proof of Lemma 3

*Proof.* We start by defining  $S'_0 := \text{OPT}_{(k-\tau, V \setminus E_0)} \cap (S_0 \setminus E_0)$  and  $X := \text{OPT}_{(k-\tau, V \setminus E_0)} \setminus S'_0$ .

$$f(S_0 \setminus E_0) + f(\text{OPT}_{(k-\tau, V \setminus S_0)}) \geq f(S'_0) + f(X) \tag{24}$$

$$\geq \theta f(\text{OPT}_{(k-\tau, V \setminus E_0)}) \tag{25}$$

$$\geq \theta f(\text{OPT}_{(k-\tau, V \setminus E_S^*)}), \tag{26}$$

where (24) follows from monotonicity as  $S'_0 \subseteq (S_0 \setminus E_0)$  and  $(V \setminus S_0) \subseteq (V \setminus E_0)$ . Eq. (25) follows from the fact that  $\text{OPT}_{(k-\tau, V \setminus E_0)} = S'_0 \cup X$  and the bipartite subadditive property (10). The final equation follows from the definition of the optimal solution and the fact that  $E_S^* = E_0 \cup E_1$ .

By rearranging and noting that  $f(S \setminus E_S^*) \geq f(S_0 \setminus E_0)$  due to  $(S_0 \setminus E_0) \subseteq (S \setminus E_S^*)$  and monotonicity, we obtain

$$f(S \setminus E_S^*) \geq \theta f(\text{OPT}_{(k-\tau, V \setminus E_S^*)}) - f(\text{OPT}_{(k-\tau, V \setminus S_0)}).$$

□

### C.3 Proof of Theorem 1

Before proving the theorem we outline the following auxiliary lemma:

**Lemma 5** (Lemma D.2 in [2]). *For any set function  $f$ , sets  $A, B$ , and constant  $\alpha > 0$ , we have*

$$\max\{\alpha f(A), \beta f(B) - f(A)\} \geq \left(\frac{\alpha}{1+\alpha}\right) \beta f(B). \quad (27)$$

Next, we prove the main theorem.

*Proof.* First we note that  $\beta$  should be chosen such that the following condition holds  $|S_0| = \lceil \beta \tau \rceil \leq k$ . When  $\tau = \lceil ck \rceil$  for  $c \in (0, 1)$  and  $k \rightarrow \infty$  the condition  $\beta < \frac{1}{c}$  suffices.

We consider two cases, when  $\mu = 0$  and  $\mu \neq 0$ . When  $\mu = 0$ , from Lemma 2 we have

$$f(S \setminus E_S^*) \geq f(S_1) \quad (28)$$

On the other hand, when  $\mu \neq 0$ , by Lemma 2 and 4 we have

$$\begin{aligned} f(S \setminus E_S^*) &\geq \max\{(1-\mu)f(S_1), (\beta-1)\check{\nu}(1-\check{\alpha})\mu f(S_1)\} \\ &\geq \frac{(\beta-1)\check{\nu}(1-\check{\alpha})}{1+(\beta-1)\check{\nu}(1-\check{\alpha})} f(S_1). \end{aligned} \quad (29)$$

By denoting  $P := \frac{(\beta-1)\check{\nu}(1-\check{\alpha})}{1+(\beta-1)\check{\nu}(1-\check{\alpha})}$  we observe that  $P \in [0, 1)$  once  $\beta \geq 1$ . Hence, by setting  $\beta \geq 1$  and taking the minimum between two bounds in Eq. (29) and Eq. (28) we conclude that Eq. (29) holds for any  $\mu \in [0, 1]$ .

By combining Eq. (29) with Lemma 1 we obtain

$$f(S \setminus E_S^*) \geq P \left(1 - e^{-\gamma \frac{k - \lceil \beta \tau \rceil}{k - \tau}}\right) f(\text{OPT}_{(k-\tau, V \setminus S_0)}). \quad (30)$$

By further combining this with Lemma 3 we have

$$\begin{aligned} f(S \setminus E_S^*) &\geq \max\{\theta f(\text{OPT}_{(k-\tau, V \setminus E_S^*)}) - f(\text{OPT}_{(k-\tau, V \setminus S_0)}), P \left(1 - e^{-\gamma \frac{k - \lceil \beta \tau \rceil}{k - \tau}}\right) f(\text{OPT}_{(k-\tau, V \setminus S_0)})\} \\ &\geq \theta \frac{P \left(1 - e^{-\gamma \frac{k - \lceil \beta \tau \rceil}{k - \tau}}\right)}{1 + P \left(1 - e^{-\gamma \frac{k - \lceil \beta \tau \rceil}{k - \tau}}\right)} f(\text{OPT}_{(k-\tau, V \setminus E_S^*)}) \end{aligned} \quad (31)$$

where the second inequality follows from Lemma 5. By plugging in  $\tau = \lceil ck \rceil$  we further obtain

$$\begin{aligned} f(S \setminus E_S^*) &\geq \theta \frac{P \left(1 - e^{-\gamma \frac{k - \beta \lceil ck \rceil - 1}{(1-c)k}}\right)}{1 + P \left(1 - e^{-\gamma \frac{k - \beta \lceil ck \rceil - 1}{(1-c)k}}\right)} f(\text{OPT}_{(k-\tau, V \setminus E_S^*)}) \\ &\geq \theta \frac{P \left(1 - e^{-\gamma \frac{1 - \beta c - \frac{1}{k} - \frac{\beta}{k}}{1-c}}\right)}{1 + P \left(1 - e^{-\gamma \frac{1 - \beta c - \frac{1}{k} - \frac{\beta}{k}}{1-c}}\right)} f(\text{OPT}_{(k-\tau, V \setminus E_S^*)}) \\ &\xrightarrow{k \rightarrow \infty} \frac{\theta P \left(1 - e^{-\gamma \frac{1 - \beta c}{1-c}}\right)}{1 + P \left(1 - e^{-\gamma \frac{1 - \beta c}{1-c}}\right)} f(\text{OPT}_{(k-\tau, V \setminus E_S^*)}). \end{aligned}$$

Finally, Remark 2 follows from Eq. (30) when  $\tau \in o\left(\frac{k}{\beta}\right)$  and  $\beta \geq \log k$  (note that the condition  $|S_0| = \lceil \beta \tau \rceil \leq k$  is thus satisfied), as  $k \rightarrow \infty$ , we have both  $\frac{k - \lceil \beta \tau \rceil}{k - \tau} \rightarrow 1$  and  $P = \frac{(\beta-1)\check{\nu}(1-\check{\alpha})}{1+(\beta-1)\check{\nu}(1-\check{\alpha})} \rightarrow 1$ , when  $\check{\nu} \in (0, 1)$  and  $\check{\alpha} \in [0, 1)$ .

□

#### C.4 Proof of Corollary 1

To prove this result we need the following two lemmas that can be thought of as the alternative to Lemma 2 and 4.

**Lemma 6.** *Let  $\mu' \in [0, 1]$  be a constant such that  $f(E_1) = \mu' f(S_1)$  holds. Consider  $f(\cdot)$  with bipartite subadditivity ratio  $\theta \in [0, 1]$  defined in Eq. (4). Then*

$$f(S \setminus E_S^*) \geq (\theta - \mu') f(S_1). \quad (32)$$

*Proof.* By the definition of  $\theta$ ,  $f(S_1 \setminus E_1) + f(E_1) \geq \theta f(S_1)$ . Hence,

$$\begin{aligned} f(S \setminus E_S^*) &\geq f(S_1 \setminus E_1) \\ &\geq \theta f(S_1) - f(E_1) \\ &= (\theta - \mu') f(S_1). \end{aligned}$$

□

**Lemma 7.** *Let  $\beta$  be a constant such that  $|S_0| = \lceil \beta \tau \rceil$  and  $|S_0| \leq k$ , and let  $\check{\nu}, \nu \in [0, 1]$  be superadditivity and subadditivity ratio (Eq. (9) and Eq. (8), respectively). Finally, let  $\mu'$  be a constant defined as in Lemma 6. Then,*

$$f(S \setminus E_S^*) \geq (\beta - 1) \check{\nu} \nu \mu' f(S_1). \quad (33)$$

*Proof.* The proof follows that of Lemma 4, with two modifications. In Eq. (34) we used the subadditive property of  $f(\cdot)$ , and Eq. (35) follows by the definition of  $\mu'$ .

$$\begin{aligned} f(S \setminus E_S^*) &\geq f(S_0 \setminus E_0) \\ &\geq \check{\nu} \sum_{e_i \in S_0 \setminus E_0} f(\{e_i\}) \\ &\geq \frac{|S_0 \setminus E_0|}{|E_1|} \check{\nu} \sum_{e_i \in E_1} f(\{e_i\}) \\ &\geq \frac{(\beta - 1)\tau}{\tau} \check{\nu} \sum_{e_i \in E_1} f(\{e_i\}) \\ &\geq (\beta - 1) \check{\nu} \nu f(E_1) \\ &= (\beta - 1) \check{\nu} \nu \mu' f(S_1). \end{aligned} \quad (34)$$

$$= (\beta - 1) \check{\nu} \nu \mu' f(S_1). \quad (35)$$

□

Next we prove the main corollary. The proof follows the steps of the proof from Appendix C.3, except that here we make use of Lemma 6 and 7.

*Proof.* We consider two cases, when  $\mu' = 0$  and  $\mu' \neq 0$ . When  $\mu' = 0$ , from Lemma 6 we have

$$f(S \setminus E_S^*) \geq \theta f(S_1).$$

On the other hand, when  $\mu' \neq 0$ , by Lemma 6 and 7 we have

$$\begin{aligned} f(S \setminus E_S^*) &\geq \max\{(\theta - \mu') f(S_1), (\beta - 1) \check{\nu} \nu \mu' f(S_1)\} \\ &\geq \theta \frac{(\beta - 1) \check{\nu} \nu}{1 + (\beta - 1) \check{\nu} \nu} f(S_1). \end{aligned} \quad (36)$$

By denoting  $P := \frac{(\beta - 1) \check{\nu} \nu}{1 + (\beta - 1) \check{\nu} \nu}$  and observing that  $P \in [0, 1]$  once  $\beta \geq 1$ , we conclude that Eq. (36) holds for any  $\mu' \in [0, 1]$  once  $\beta \geq 1$ .

By combining Eq. (36) with Lemma 1 we obtain

$$f(S \setminus E_S^*) \geq \theta P \left(1 - e^{-\gamma \frac{k - \lceil \beta \tau \rceil}{k - \tau}}\right) f(\text{OPT}_{(k - \tau, V \setminus S_0)}). \quad (37)$$

By further combining this with Lemma 3 we have

$$\begin{aligned} f(S \setminus E_S^*) &\geq \max\{\theta f(\text{OPT}_{(k-\tau, V \setminus E_S^*)}) - f(\text{OPT}_{(k-\tau, V \setminus S_0)}), \theta P \left(1 - e^{-\gamma \frac{k - \lceil \beta \tau \rceil}{k - \tau}}\right) f(\text{OPT}_{(k-\tau, V \setminus S_0)})\} \\ &\geq \frac{\theta^2 P \left(1 - e^{-\gamma \frac{k - \lceil \beta \tau \rceil}{k - \tau}}\right)}{1 + \theta P \left(1 - e^{-\gamma \frac{k - \lceil \beta \tau \rceil}{k - \tau}}\right)} f(\text{OPT}_{(k-\tau, V \setminus E_S^*)}), \end{aligned} \quad (38)$$

where the second inequality follows from Lemma 5. By plugging in  $\tau = \lceil ck \rceil$  in the last equation and by letting  $k \rightarrow \infty$  we arrive at:

$$f(S \setminus E_S^*) \geq \frac{\theta^2 P \left(1 - e^{-\gamma \frac{1 - \beta c}{1 - c}}\right)}{1 + \theta P \left(1 - e^{-\gamma \frac{1 - \beta c}{1 - c}}\right)} f(\text{OPT}_{(k-\tau, V \setminus E_S^*)}).$$

Finally, from Eq. (38), when  $\tau \in o\left(\frac{k}{\beta}\right)$  and  $\beta \geq \log k$ , as  $k \rightarrow \infty$ , we have both  $\frac{k - \lceil \beta \tau \rceil}{k - \tau} \rightarrow 1$  and  $P = \frac{(\beta - 1)\check{\nu}\nu}{1 + (\beta - 1)\check{\nu}\nu} \rightarrow 1$  (when  $\nu, \check{\nu} \in (0, 1]$ ). It follows

$$f(S \setminus E_S^*) \xrightarrow{k \rightarrow \infty} \frac{\theta^2(1 - e^{-\gamma})}{1 + \theta(1 - e^{-\gamma})} f(\text{OPT}_{(k-\tau, V \setminus E_S^*)}).$$

□

## D Proofs from Section 4

### D.1 Proof of Proposition 2

*Proof.* The goal is to prove:  $\check{\gamma} \geq \frac{m}{L}$ .

Let  $S \subseteq [d]$  and  $\Omega \subseteq [d]$  be any two disjoint sets, and for any set  $A \subseteq [d]$  let  $\mathbf{x}^{(A)} = \arg \max_{\text{supp}(\mathbf{x}) \subseteq A, \mathbf{x} \in \mathcal{X}} l(\mathbf{x})$ . Moreover, for  $B \subseteq [d]$  let  $\mathbf{x}_B^{(A)}$  denote those coordinates of vector  $\mathbf{x}^{(A)}$  that correspond to the indices in  $B$ .

We proceed by upper bounding the denominator and lower bounding the numerator in (5). By definition of  $\mathbf{x}^{(S)}$  and strong concavity of  $l(\cdot)$ ,

$$\begin{aligned} l(\mathbf{x}^{(S \cup \{i\})}) - l(\mathbf{x}^{(S)}) &\leq \langle \nabla l(\mathbf{x}^{(S)}), \mathbf{x}^{(S \cup \{i\})} - \mathbf{x}^{(S)} \rangle - \frac{m}{2} \left\| \mathbf{x}^{(S \cup \{i\})} - \mathbf{x}^{(S)} \right\|^2 \\ &\leq \max_{\mathbf{v}: \mathbf{v}_{(S \cup \{i\})^c} = 0} \langle \nabla l(\mathbf{x}^{(S)}), \mathbf{v} - \mathbf{x}^{(S)} \rangle - \frac{m}{2} \left\| \mathbf{v} - \mathbf{x}^{(S)} \right\|^2 \\ &= \frac{1}{2m} \left\| \nabla l(\mathbf{x}^{(S)})_i \right\|^2 \end{aligned}$$

where the last equality follows by plugging in the maximizer  $\mathbf{v} = \mathbf{x}^{(S)} + \frac{1}{m} \nabla l(\mathbf{x}^{(S)})_i$ . Hence,

$$\sum_{i \in \Omega} \left( l(\mathbf{x}^{(S \cup \{i\})}) - l(\mathbf{x}^{(S)}) \right) \leq \sum_{i \in \Omega} \frac{1}{2m} \left\| \nabla l(\mathbf{x}^{(S)})_i \right\|^2 = \frac{1}{2m} \left\| \nabla l(\mathbf{x}^{(S)})_\Omega \right\|^2.$$

On the other hand, from the definition of  $\mathbf{x}^{(S \cup \Omega)}$  and due to smoothness of  $l(\cdot)$  we have

$$\begin{aligned} l(\mathbf{x}^{(S \cup \Omega)}) - l(\mathbf{x}^{(S)}) &\geq l(\mathbf{x}^{(S)}) + \frac{1}{L} \nabla l(\mathbf{x}^{(S)})_\Omega - l(\mathbf{x}^{(S)}) \\ &\geq \langle \nabla l(\mathbf{x}^{(S)}), \frac{1}{L} \nabla l(\mathbf{x}^{(S)})_\Omega \rangle - \frac{L}{2} \left\| \frac{1}{L} \nabla l(\mathbf{x}^{(S)})_\Omega \right\|^2 \\ &= \frac{1}{2L} \left\| l(\mathbf{x}^{(S)})_\Omega \right\|^2. \end{aligned}$$

It follows that

$$\frac{l(\mathbf{x}^{(S \cup \Omega)}) - l(\mathbf{x}^{(S)})}{\sum_{i \in \Omega} (l(\mathbf{x}^{(S \cup \{i\})}) - l(\mathbf{x}^{(S)}))} \geq \frac{m}{L}, \quad \forall \text{ disjoint } S, \Omega \subseteq [d]$$

We finish the proof by noting that  $\tilde{\gamma}$  is the largest constant for the above statement to hold. □

## D.2 Variance Reduction in GPs

### D.2.1 Non-submodularity of Variance Reduction

The goal of this section is to show that the GP variance reduction objective is not submodular in general. Consider the following PSD kernel matrix:

$$\mathbf{K} = \begin{bmatrix} 1 & \sqrt{1-z^2} & 0 \\ \sqrt{1-z^2} & 1 & z^2 \\ 0 & z^2 & 1 \end{bmatrix}.$$

We consider a single  $x = \{3\}$  (i.e.  $M$  is a singleton) that corresponds to the third data point. The objective is as follows:

$$F(i|S) = \sigma_{\{3\}|S}^2 - \sigma_{\{3\}|S \cup i}^2.$$

The submodular property implies  $F(\{1\}) \geq F(\{1\}|\{2\})$ . We have:

$$\begin{aligned} F(\{1\}) &= \sigma_{\{3\}}^2 - \sigma_{\{3\}|\{1\}}^2 \\ &= 1 - K(\{3\}, \{3\}) - K(\{3\}, \{1\})(K(\{1\}, \{1\}) + \sigma^2)^{-1}K(\{1\}, \{3\}) \\ &= 1 - 1 + 0 = 0, \end{aligned}$$

and

$$\begin{aligned} F(\{2\}) &= \sigma_{\{3\}}^2 - \sigma_{\{3\}|\{2\}}^2 \\ &= 1 - K(\{3\}, \{3\}) - K(\{3\}, \{2\})(K(\{2\}, \{2\}) + \sigma^2)^{-1}K(\{2\}, \{3\}) \\ &= 1 - (1 - z^2(1 + \sigma^2)^{-1}z^2) = \frac{z^4}{1 + \sigma^2}, \end{aligned}$$

and

$$\begin{aligned} F(\{1, 2\}) &= \sigma_{\{3\}}^2 - \sigma_{\{3\}|\{1, 2\}}^2 \\ &= 1 - K(\{3\}, \{3\}) + [K(\{3\}, \{1\}), K(\{3\}, \{2\})] \begin{bmatrix} 1 + \sigma^2, K(\{2\}, \{1\}) \\ K(\{1\}, \{2\}), 1 + \sigma^2 \end{bmatrix}^{-1} \begin{bmatrix} K(\{1\}, \{3\}) \\ K(\{2\}, \{3\}) \end{bmatrix} \\ &= 1 - 1 + [0, z^2] \begin{bmatrix} 1 + \sigma^2, \sqrt{1-z^2} \\ \sqrt{1-z^2}, 1 + \sigma^2 \end{bmatrix}^{-1} \begin{bmatrix} 0 \\ z^2 \end{bmatrix} \\ &= \frac{z^4(1 + \sigma^2)}{(1 + \sigma^2)^2 - (1 - z^2)}. \end{aligned}$$

We obtain,

$$\begin{aligned} F(\{1\}|\{2\}) &= F(\{1, 2\}) - F(\{2\}) \\ &= \frac{z^4}{(1 + \sigma^2) - (1 - z^2)(1 + \sigma^2)^{-1}} - \frac{z^4}{1 + \sigma^2}. \end{aligned}$$

When  $z \in (0, 1)$ ,  $F(\{1\}|\{2\})$  is strictly greater than 0, and hence greater than  $F(\{1\})$ . This is in contradiction with the submodular property which implies  $F(\{1\}) \geq F(\{1\}|\{2\})$ .

### D.2.2 Proof of Proposition 3

*Proof.* We are interested in lower bounding the following ratios:  $\frac{f(\{i\}|S \setminus \{i\} \cup \Omega)}{f(\{i\}|S \setminus \{i\})}$  and  $\frac{f(\{i\}|S \setminus \{i\})}{f(\{i\}|S \setminus \{i\} \cup \Omega)}$ .

Let  $k_{\max} \in \mathbb{R}_+$  be the largest variance, i.e.  $k(\mathbf{x}_i, \mathbf{x}_i) \leq k_{\max}$  for every  $i$ . Consider the case when  $M$  is a singleton set:

$$f(i|S) = \sigma_{\mathbf{x}|S}^2 - \sigma_{\mathbf{x}|S \cup i}^2.$$

By using  $\Omega = \{i\}$  in Eq. (39), we can rewrite  $f(i|S)$  as

$$f(i|S) = a_i^2 B_i^{-1},$$

where  $a_i, B_i \in \mathbb{R}_+$ , and are given by:

$$a_i = k(\mathbf{x}, \mathbf{x}_i) - k(\mathbf{x}, \mathbf{X}_S)(k(\mathbf{X}_S, \mathbf{X}_S) + \sigma^2 \mathbf{I})^{-1} k(\mathbf{X}_S, \mathbf{x}_i)$$

and

$$B_i = \sigma^2 + k(\mathbf{x}_i, \mathbf{x}_i) - k(\mathbf{x}_i, \mathbf{X}_S)(k(\mathbf{X}_S, \mathbf{X}_S) + \sigma^2 \mathbf{I})^{-1} k(\mathbf{X}_S, \mathbf{x}_i).$$

By using the fact that  $k(\mathbf{x}_i, \mathbf{x}_i) \leq k_{\max}$ , for every  $i$  and  $S$ , we can upper bound  $B_i$  by  $\sigma^2 + k_{\max}$  (note that  $k(\mathbf{x}_i, \mathbf{x}_i) - k(\mathbf{x}_i, \mathbf{X}_S)(k(\mathbf{X}_S, \mathbf{X}_S) + \sigma^2 \mathbf{I})^{-1} k(\mathbf{X}_S, \mathbf{x}_i) \geq 0$  as variance cannot be negative), and lower bound by  $\sigma^2$ . It follows that for every  $i$  and  $S$  we have:

$$\frac{a_i^2}{\sigma^2 + k_{\max}} \leq f(i|S) \leq \frac{a_i^2}{\sigma^2}.$$

Therefore,

$$\begin{aligned} \frac{f(\{i\}|S \setminus \{i\} \cup \Omega)}{f(\{i\}|S \setminus \{i\})} &\geq \frac{a_i^2/(\sigma^2 + k_{\max})}{a_i^2/\sigma^2} = \frac{\sigma^2}{\sigma^2 + k_{\max}}, \quad \forall S, \Omega \subseteq V, i \in S \setminus \Omega, \\ \frac{f(\{i\}|S \setminus \{i\})}{f(\{i\}|S \setminus \{i\} \cup \Omega)} &\geq \frac{a_i^2/(\sigma^2 + k_{\max})}{a_i^2/\sigma^2} = \frac{\sigma^2}{\sigma^2 + k_{\max}}, \quad \forall S, \Omega \subseteq V, i \in S \setminus \Omega. \end{aligned}$$

It follows:

$$\begin{aligned} (1 - \alpha) &\geq \frac{\sigma^2}{\sigma^2 + k_{\max}}, \quad \text{and} \\ (1 - \tilde{\alpha}) &\geq \frac{\sigma^2}{\sigma^2 + k_{\max}}. \end{aligned}$$

The obtained result also holds for any set  $M \subseteq [n]$ . □

### D.2.3 Alternative GP variance reduction form

Here, the goal is to show that the variance reduction can be written as

$$F(\Omega|S) = \sigma_{\mathbf{x}|S}^2 - \sigma_{\mathbf{x}|S \cup \Omega}^2 = \mathbf{a} \mathbf{B}^{-1} \mathbf{a}^T, \quad (39)$$

where  $\mathbf{a} \in \mathbb{R}_+^{1 \times |\Omega \setminus S|}$ ,  $\mathbf{B} \in \mathbb{R}_+^{|\Omega \setminus S| \times |\Omega \setminus S|}$  and are given by:

$$\mathbf{a} := k(\mathbf{x}, \mathbf{X}_{\Omega \setminus S}) - k(\mathbf{x}, \mathbf{X}_S)(k(\mathbf{X}_S, \mathbf{X}_S) + \sigma^2 \mathbf{I})^{-1} k(\mathbf{X}_S, \mathbf{X}_{\Omega \setminus S}),$$

and

$$\mathbf{B} := \sigma^2 \mathbf{I} + k(\mathbf{X}_{\Omega \setminus S}, \mathbf{X}_{\Omega \setminus S}) - k(\mathbf{X}_{\Omega \setminus S}, \mathbf{X}_S)(k(\mathbf{X}_S, \mathbf{X}_S) + \sigma^2 \mathbf{I})^{-1} k(\mathbf{X}_S, \mathbf{X}_{\Omega \setminus S}).$$

This form is used in the proof in Appendix D.2.2.

*Proof.* Recall the definition of the posterior variance:

$$\sigma_{\mathbf{x}|S}^2 = k(\mathbf{x}, \mathbf{x}) - k(\mathbf{x}, \mathbf{X}_S) (k(\mathbf{X}_S, \mathbf{X}_S) + \sigma^2 \mathbf{I}_{|S|})^{-1} k(\mathbf{X}_S, \mathbf{x}).$$

We have

$$\begin{aligned} F(\Omega|S) &= \sigma_{\mathbf{x}|S}^2 - \sigma_{\mathbf{x}|S \cup \Omega}^2 \\ &= k(\mathbf{x}, \mathbf{X}_{S \cup \Omega}) (k(\mathbf{X}_{S \cup \Omega}, \mathbf{X}_{S \cup \Omega}) + \sigma^2 \mathbf{I}_{|\Omega \cup S|})^{-1} k(\mathbf{X}_{S \cup \Omega}, \mathbf{x}) - k(\mathbf{x}, \mathbf{X}_S) (k(\mathbf{X}_S, \mathbf{X}_S) + \sigma^2 \mathbf{I}_{|S|})^{-1} k(\mathbf{X}_S, \mathbf{x}) \\ &= [\mathbf{m}_1, \mathbf{m}_2] \begin{bmatrix} \mathbf{A}_{11} & \mathbf{A}_{12} \\ \mathbf{A}_{21} & \mathbf{A}_{22} \end{bmatrix}^{-1} \begin{bmatrix} \mathbf{m}_1^T \\ \mathbf{m}_2^T \end{bmatrix} - \mathbf{m}_1 \mathbf{A}_{11}^{-1} \mathbf{m}_1^T, \end{aligned}$$

where we use the following notation:

$$\begin{aligned} \mathbf{m}_1 &:= k(\mathbf{x}, \mathbf{X}_S), \\ \mathbf{m}_2 &:= k(\mathbf{x}, \mathbf{X}_{\Omega \setminus S}), \\ \mathbf{A}_{11} &:= k(\mathbf{X}_S, \mathbf{X}_S) + \sigma^2 \mathbf{I}_{|S|}, \\ \mathbf{A}_{12} &:= k(\mathbf{X}_S, \mathbf{X}_{\Omega \setminus S}), \\ \mathbf{A}_{21} &:= k(\mathbf{X}_{\Omega \setminus S}, \mathbf{X}_S), \\ \mathbf{A}_{22} &:= k(\mathbf{X}_{\Omega \setminus S}, \mathbf{X}_{\Omega \setminus S}) + \sigma^2 \mathbf{I}_{|\Omega \setminus S|}. \end{aligned}$$

By using the inverse formula [39, Section 9.1.3] we obtain:

$$F(\Omega|S) = [\mathbf{m}_1, \mathbf{m}_2] \begin{bmatrix} \mathbf{A}_{11}^{-1} + \mathbf{A}_{11}^{-1} \mathbf{A}_{12} \mathbf{B}^{-1} \mathbf{A}_{21} \mathbf{A}_{11}^{-1}, & -\mathbf{A}_{11}^{-1} \mathbf{A}_{12} \mathbf{B}^{-1} \\ -\mathbf{B}^{-1} \mathbf{A}_{21} \mathbf{A}_{11}^{-1}, & \mathbf{B}^{-1} \end{bmatrix} \begin{bmatrix} \mathbf{m}_1^T \\ \mathbf{m}_2^T \end{bmatrix} - \mathbf{m}_1 \mathbf{A}_{11}^{-1} \mathbf{m}_1^T,$$

where

$$\mathbf{B} := \mathbf{A}_{22} - \mathbf{A}_{21} \mathbf{A}_{11}^{-1} \mathbf{A}_{12}.$$

Finally, we obtain:

$$\begin{aligned} F(\Omega|S) &= \mathbf{m}_1 \mathbf{A}_{11}^{-1} \mathbf{m}_1^T + \mathbf{m}_1 \mathbf{A}_{11}^{-1} \mathbf{A}_{12} \mathbf{B}^{-1} \mathbf{A}_{21} \mathbf{A}_{11}^{-1} \mathbf{m}_1^T - \mathbf{m}_2 \mathbf{B}^{-1} \mathbf{A}_{21} \mathbf{A}_{11}^{-1} \mathbf{m}_1^T \\ &\quad - \mathbf{m}_1 \mathbf{A}_{11}^{-1} \mathbf{A}_{12} \mathbf{B}^{-1} \mathbf{m}_2^T + \mathbf{m}_2 \mathbf{B}^{-1} \mathbf{m}_2^T - \mathbf{m}_1 \mathbf{A}_{11}^{-1} \mathbf{m}_1^T \\ &= \mathbf{m}_1 \mathbf{A}_{11}^{-1} \mathbf{A}_{12} \mathbf{B}^{-1} (\mathbf{A}_{21} \mathbf{A}_{11}^{-1} \mathbf{m}_1^T - \mathbf{m}_2^T) - \mathbf{m}_2 \mathbf{B}^{-1} (\mathbf{A}_{21} \mathbf{A}_{11}^{-1} \mathbf{m}_1^T - \mathbf{m}_2^T) \\ &= (\mathbf{m}_1 \mathbf{A}_{11}^{-1} \mathbf{A}_{12} - \mathbf{m}_2) \mathbf{B}^{-1} (\mathbf{A}_{21} \mathbf{A}_{11}^{-1} \mathbf{m}_1^T - \mathbf{m}_2^T) \\ &= (\mathbf{m}_2 - \mathbf{m}_1 \mathbf{A}_{11}^{-1} \mathbf{A}_{12}) \mathbf{B}^{-1} (\mathbf{m}_2^T - \mathbf{A}_{21} \mathbf{A}_{11}^{-1} \mathbf{m}_1^T). \end{aligned}$$

By setting

$$\begin{aligned} \mathbf{a} &:= \mathbf{m}_2 - \mathbf{m}_1 \mathbf{A}_{11}^{-1} \mathbf{A}_{12} \\ &= k(\mathbf{x}, \mathbf{X}_{\Omega \setminus S}) - k(\mathbf{x}, \mathbf{X}_S) (k(\mathbf{X}_S, \mathbf{X}_S) + \sigma^2 \mathbf{I})^{-1} k(\mathbf{X}_S, \mathbf{X}_{\Omega \setminus S}) \end{aligned}$$

and

$$\begin{aligned} \mathbf{a}^T &:= \mathbf{m}_2^T - \mathbf{A}_{21} \mathbf{A}_{11}^{-1} \mathbf{m}_1^T \\ &= k(\mathbf{X}_{\Omega \setminus S}, \mathbf{x}) - k(\mathbf{X}_{\Omega \setminus S}, \mathbf{X}_S) (k(\mathbf{X}_S, \mathbf{X}_S) + \sigma^2 \mathbf{I})^{-1} k(\mathbf{X}_S, \mathbf{x}), \end{aligned}$$

we have

$$F(\Omega|S) = \mathbf{a} \mathbf{B}^{-1} \mathbf{a}^T,$$

where

$$\mathbf{B} = \sigma^2 \mathbf{I}_{|\Omega \setminus S|} + k(\mathbf{X}_{\Omega \setminus S}, \mathbf{X}_{\Omega \setminus S}) - k(\mathbf{X}_{\Omega \setminus S}, \mathbf{X}_S) (k(\mathbf{X}_S, \mathbf{X}_S) + \sigma^2 \mathbf{I}_{|S|})^{-1} k(\mathbf{X}_S, \mathbf{X}_{\Omega \setminus S}).$$

□



## E Additional Experiments

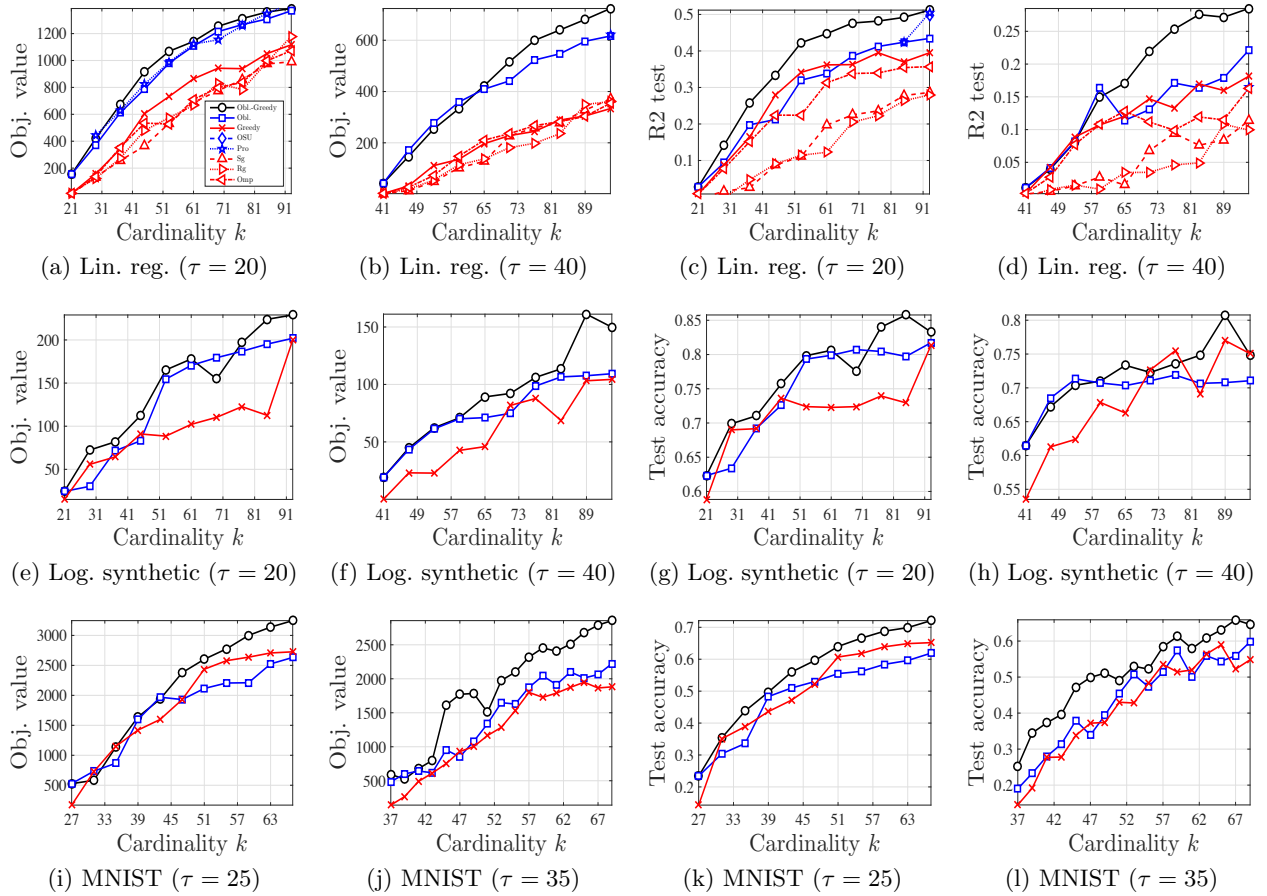

Figure 6: Additional experiments for comparison of the algorithms on support selection task.
